# Supplementary material for: Barriers and facilitators to uptake of Trachomatous trichiasis surgery in Jimma zone, South west Ethiopia, 2023: a qualitative case study
Source: Research Square preprint supplement (doi:10.21203/rs.3.rs-7906766/v1), 2025-10-28
Supplement: Supplementary file 1 [file 677afe0d4fb71f22a2e322d7.docx]

**Central themes and sub-themes**

| Main Theme | Sub-theme/ category and sub category |
| --- | --- |
| 1. Individual related (demand side) barriers | - 1. knowledge and Perception toward trachomatous trichiasis.      1. Local diagnosis and treatment of their eye problem      2. perception of severity      3. Misconception   2. Socio-economic factors      1. lack of family/social support      2. financial constraints   3. Knowledge and perception toward TT surgery      1. Myths and rumor about TT surgery      2. Fear of TT surgery      3. Information contamination |
| 1. Individual related (demand side) facilitators | 2.1. positive outcome of TT surgery  2.2. pre-TT surgery experience  2.3 Awareness of consequence of TT |
| 1. TT surgery program related (supply side) barriers | - 1. Lack of government attention   2. Inaccessibility of routine TT surgery service   3. Shortage of health care providers   4. Respect from health care providers   5. Skill gab |
| 1. TT surgery program related (supply side) facilitators | - 1. Health care providers commitment   2. Referral linkage of TT cases   3. Engagement of non-governmental organizations |
